# Supplementary material for: Structural Characterization of Carbonic Anhydrase VIII and Effects of Missense Single Nucleotide Variations to Protein Structure and Function
Source: PubMed Central journal article supplement (PMC7215520; doi:10.3390/ijms21082764), 2020-04-16
Supplement: ijms-21-02764-s001.pdf [file ijms-21-02764-s001.pdf]

# **Supplementary Materials: Structural Characterization of Carbonic Anhydrase VIII and effects of Missense Single Nucleotide Variations to Protein Structure and Function**

Taremekedzwa Allan Sanyanga <sup>1</sup>  and Özlem Tastan Bishop <sup>1,\*</sup> 

**Table S1.** CA-VIII potential protein-protein binding sites and residues. SNV positions are italicised, underlined and highlighted in bold red.

| <b>SiteMap</b>                        |                  |                                                                                                                                                                                                                                                                                                                                                                                                                                                                                                                                                                                      |
|---------------------------------------|------------------|--------------------------------------------------------------------------------------------------------------------------------------------------------------------------------------------------------------------------------------------------------------------------------------------------------------------------------------------------------------------------------------------------------------------------------------------------------------------------------------------------------------------------------------------------------------------------------------|
| <b>Binding site</b>                   | <b>SiteScore</b> | <b>Binding site residues</b>                                                                                                                                                                                                                                                                                                                                                                                                                                                                                                                                                         |
| 1                                     | 0.885            | 23 24 25 26 27 28 29 30 31 32 33 34 35 36 37 38 39 40 41 43 44 45 46 47 49 51 52 53 54 55 58<br>59 60 61 62 76 77 78 79 80 81 83 84 85 86 87 88 90 92 93 94 95 96 111 113 114 116 118 119<br>121 122 123 124 125 126 127 128 130 133 134 135 136 137 141 143 145 152 153 154 155 157<br>158 159 163 165 171 172 177 178 180 181 183 184 185 187 188 190 191 192 193 194 196 198<br>199 200 201 202 205 222 223 224 225 226 228 229 233 245 246 248 249 251 252 254 255 256<br>257 258 260 261 262 263 264 266 269 270 271 272 274 275 276 277 278 279 280 281 282 283<br>284 285 286 |
| 2                                     | 0.908            | 56 57 59 60 61 65 66 69 70 72 102 131 132 134 136 169 171 210 211 212 213 214 215 216 236<br><u>237</u> 238 239 287 288 289 290                                                                                                                                                                                                                                                                                                                                                                                                                                                      |
| 3                                     | 0.897            | 43 46 47 48 64 65 67 68 102 103 104 105 106 110 158 160 161 163 164 217 218 219 220 228<br>229 230 231 232 282 283 284 285 286                                                                                                                                                                                                                                                                                                                                                                                                                                                       |
| 4                                     | 0.881            | 68 69 71 72 73 74 75 96 97 98 <u>100</u> 101 106 107 <u>109</u> 174 175 176 177 178 204 205 207 208 209<br>210 212 213 238 239 240 241                                                                                                                                                                                                                                                                                                                                                                                                                                               |
| 5                                     | 0.792            | 190 191 252 254 255 256 257 258 259 260 262 263 266 267 268 269                                                                                                                                                                                                                                                                                                                                                                                                                                                                                                                      |
| <b>CPORT</b>                          |                  |                                                                                                                                                                                                                                                                                                                                                                                                                                                                                                                                                                                      |
| 1                                     | NA*              | 26 27 28 29 30 31 32 33 34 35 36 39 40 44 93 94 111 113 116 147 151 153 214 224 <u>237</u> 238<br>255 256 262 263 264 265 269 274 276 278 289 290                                                                                                                                                                                                                                                                                                                                                                                                                                    |
| <b>Consensus of SiteMap and CPORT</b> |                  |                                                                                                                                                                                                                                                                                                                                                                                                                                                                                                                                                                                      |
| 1                                     | NA*              | 26 27 28 29 30 31 32 33 34 35 36 39 40 44 93 94 111 113 116 147 151 153 214 224 <u>237</u> 238<br>255 256 262 263 264 265 269 274 276 278 289 290                                                                                                                                                                                                                                                                                                                                                                                                                                    |

\* No site scoring metric provided.

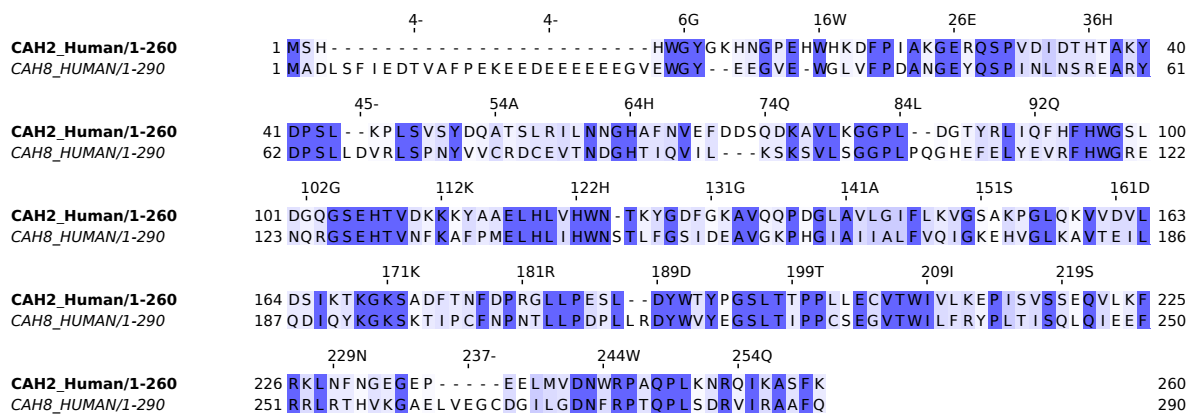

**Figure S1.** Sequence alignment showing the conserved residues between the human CA-II and CA-VIII proteins. CAH2 sequence in bold represents the reference sequence.

**Table S2.** Mapping of CA-II residues onto the CA-VIII protein structure and predicted residue function based on the sequence alignment in [Figure S1](#).

| Residue |         | Function                                                                                           | Source  |
|---------|---------|----------------------------------------------------------------------------------------------------|---------|
| CA-II   | CA-VIII |                                                                                                    |         |
| Trp5    | Trp29   | Aromatic cluster residue                                                                           | [1–3]   |
| Tyr7    | Tyr31   | Aromatic cluster residue, active site water network coordination                                   | [1–9]   |
| Trp16   | Trp37   | Aromatic cluster residue                                                                           | [1–3]   |
| Phe20   | Phe41   | Aromatic cluster residue                                                                           | [1–3]   |
| Ser29   | Ser50   | Enzymatic stability                                                                                | [10,11] |
| Asn62   | Asp85   | Active site water network coordination                                                             | [4]     |
| His64   | His87   | Proton shuttling residue                                                                           | [1,4–8] |
| Phe66   | Ile89   | Aromatic cluster residue, secondary CO <sub>2</sub> binding pocket formation                       | [1,5–8] |
| Asn67   | Gln90   | Active site water network coordination                                                             | [12]    |
| Phe70   | Leu93   | Aromatic cluster residue                                                                           | [1–3]   |
| Gln92   | Glu114  | Secondary Zn <sup>2+</sup> ligand                                                                  | [1,4]   |
| Phe93   | Val115  | Aromatic cluster residue                                                                           | [1–3]   |
| His94   | Arg116  | Zn <sup>2+</sup> coordination                                                                      | [1,4]   |
| Phe95   | Phe117  | Aromatic cluster residue, secondary CO <sub>2</sub> binding pocket formation                       | [1,5–8] |
| His96   | His118  | Zn <sup>2+</sup> coordination                                                                      | [1,4]   |
| Trp97   | Trp119  | Aromatic cluster residue, secondary CO <sub>2</sub> binding pocket formation                       | [1,5–8] |
| Glu106  | Glu128  | Orientation of Zn <sup>2+</sup> water ligand molecule for catalysis                                | [1]     |
| Glu117  | Glu139  | Zn <sup>2+</sup> affinity and catalytic efficiency, secondary Zn <sup>2+</sup> ligand              | [13]    |
| His119  | His141  | Zn <sup>2+</sup> coordination                                                                      | [1,4]   |
| Val121  | Ile143  | Primary CO <sub>2</sub> binding pocket formation                                                   | [1,5–8] |
| Val142  | Ile165  | Primary CO <sub>2</sub> binding pocket formation                                                   | [1,5–8] |
| Phe175  | Ile198  | Aromatic cluster residue                                                                           | [1–3]   |
| Phe178  | Phe201  | Aromatic cluster residue                                                                           | [1–3]   |
| Leu197  | Leu222  | Primary CO <sub>2</sub> binding pocket formation                                                   | [1,5–8] |
| Thr198  | Thr223  | Deep water molecule stabilisation, catalytic orientation of Zn <sup>2+</sup> water ligand molecule | [4]     |
| Thr199  | Ile224  | Active site water coordination, tertiary CO <sub>2</sub> binding pocket formation                  | [4]     |
| Pro200  | Pro225  | Tertiary CO <sub>2</sub> binding pocket formation                                                  | [1,5–8] |
| Trp208  | Trp233  | Primary CO <sub>2</sub> binding pocket formation                                                   | [1,5–8] |
| Phe225  | Phe250  | Aromatic cluster residue, secondary CO <sub>2</sub> binding pocket formation                       | [1,5–8] |
| Asn243  | Asn273  | Tertiary CO <sub>2</sub> binding pocket formation, secondary Zn <sup>2+</sup> ligand               | [1,5–8] |
| Arg245  | Arg275  | Enzyme stability                                                                                   | [14]    |

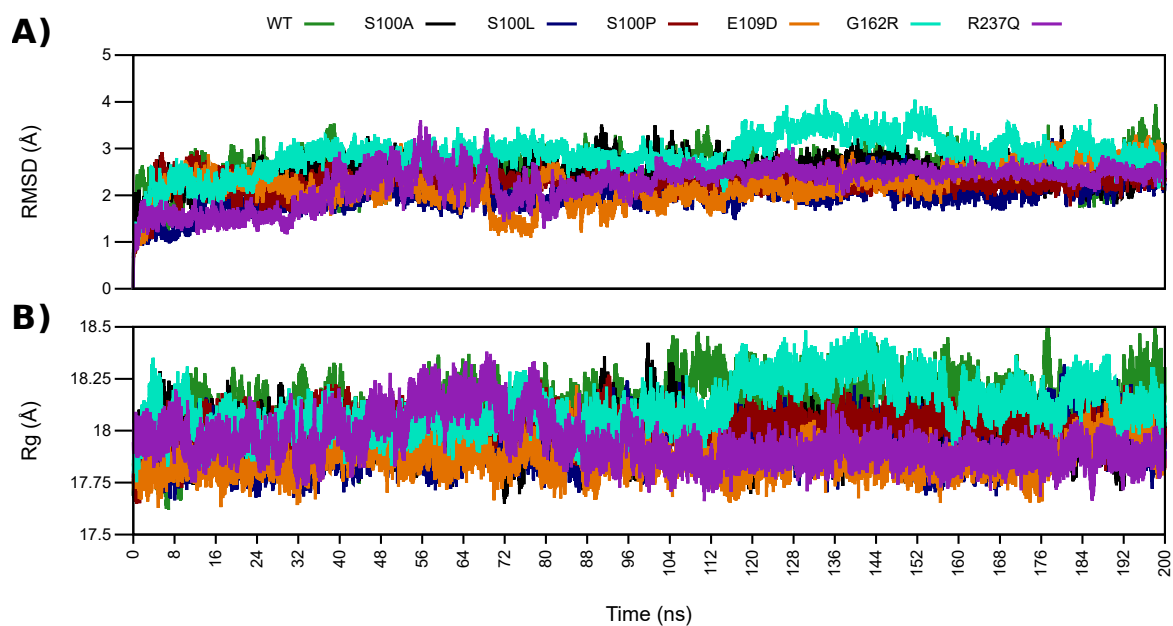

**Figure S2.**  $\alpha$ -carbon RMSD and Rg comparison between WT and variant proteins during MD simulation. (A) RMSD; (B) Rg.

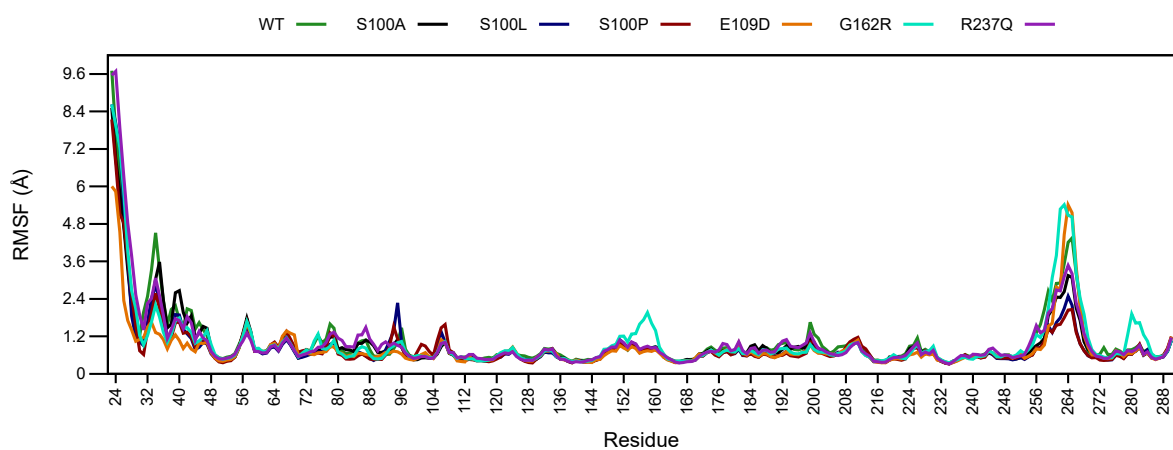

**Figure S3.** RMSF comparison between the WT and variant protein residues.

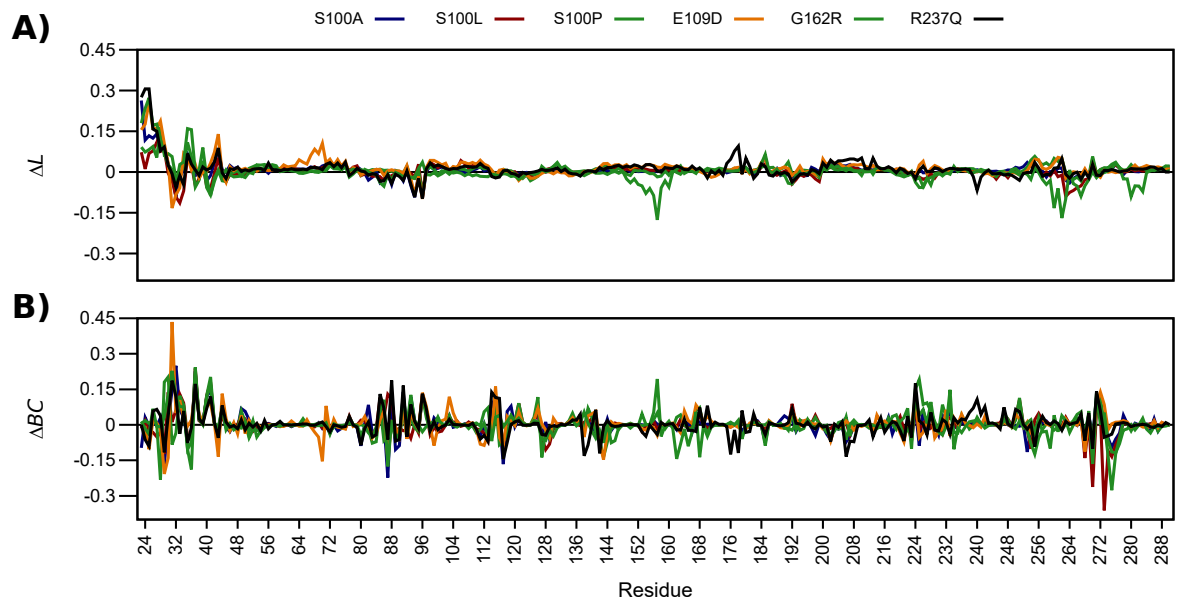

**Figure S4.**  $\Delta L$  and  $\Delta BC$  (WT – variant) showing changes variant residue accessibility and communication. **(A)**  $\Delta L$ ; **(B)**  $\Delta BC$ .

## References

1. Lindskog, S. Structure and mechanism of carbonic anhydrase. *Pharmacology & therapeutics* **1997**, *74*, 1–20.
2. Eriksson, A.E.; Jones, T.A.; Liljas, A. Refined structure of human carbonic anhydrase II at 2.0 Å resolution. *Proteins: Structure, Function, and Bioinformatics* **1988**, *4*, 274–282.
3. Hunt, J.A.; Fierke, C.A. Selection of carbonic anhydrase variants displayed on phage aromatic residues in zinc binding site enhance metal affinity and equilibration kinetics. *Journal of Biological Chemistry* **1997**, *272*, 20364–20372.
4. Silverman, D.N.; McKenna, R. Solvent-mediated proton transfer in catalysis by carbonic anhydrase. *Accounts of chemical research* **2007**, *40*, 669–675.
5. Merz Jr, K.M. Carbon dioxide binding to human carbonic anhydrase II. *Journal of the American Chemical Society* **1991**, *113*, 406–411.
6. Liang, J.Y.; Lipscomb, W.N. Binding of substrate CO<sub>2</sub> to the active site of human carbonic anhydrase II: a molecular dynamics study. *Proceedings of the National Academy of Sciences* **1990**, *87*, 3675–3679.
7. Domsic, J.F.; Avvaru, B.S.; Kim, C.U.; Gruner, S.M.; Agbandje-McKenna, M.; Silverman, D.N.; McKenna, R. Entrapment of carbon dioxide in the active site of carbonic anhydrase II. *Journal of Biological Chemistry* **2008**, *283*, 30766–30771.
8. Alexander, R.S.; Nair, S.K.; Christianson, D.W. Engineering the hydrophobic pocket of carbonic anhydrase II. *Biochemistry* **1991**, *30*, 11064–11072.
9. Mikulski, R.L.; Silverman, D.N. Proton transfer in catalysis and the role of proton shuttles in carbonic anhydrase. *Biochimica et Biophysica Acta (BBA)-Proteins and Proteomics* **2010**, *1804*, 422–426.
10. Mårtensson, L.G.; Jonsson, B.H.; Andersson, M.; Kihlgren, A.; Bergenheim, N.; Carlsson, U. Role of an evolutionarily invariant serine for the stability of human carbonic anhydrase II. *Biochimica et Biophysica Acta (BBA)-Protein Structure and Molecular Enzymology* **1992**, *1118*, 179–186.
11. Almstedt, K.; Lundqvist, M.; Carlsson, J.; Karlsson, M.; Persson, B.; Jonsson, B.H.; Carlsson, U.; Hammarström, P. Unfolding a folding disease: folding, misfolding and aggregation of the marble brain syndrome-associated mutant H107Y of human carbonic anhydrase II. *Journal of molecular biology* **2004**, *342*, 619–633.
12. Silverman, D.N.; Lindskog, S. The catalytic mechanism of carbonic anhydrase: implications of a rate-limiting protolysis of water. *Accounts of chemical research* **1988**, *21*, 30–36.
13. Kiefer, L.L.; Paterno, S.A.; Fierke, C.A. Hydrogen bond network in the metal binding site of carbonic anhydrase enhances zinc affinity and catalytic efficiency. *Journal of the american chemical society* **1995**, *117*, 6831–6837.
14. Tashian, R.E. Genetics of the mammalian carbonic anhydrases. In *Advances in genetics*; Elsevier, 1992; Vol. 30, pp. 321–356.
